# Supplementary material for: A thin film (<200 nm) perovskite solar cell with 18% efficiency
Source: Royal Society of Chemistry journal article supplement (doi:10.1039/d0ta05799a), 2020-01-01
Supplement: d0ta05799a1.pdf [file d0ta05799a1.pdf]

Supporting information

## Thin Film (< 200 nm) Perovskite Solar Cell with 18% Efficiency

Yong Zhang<sup>1</sup>, Nam-Gyu Park<sup>1\*</sup>

<sup>1</sup>School of Chemical Engineering, Sungkyunkwan University, Suwon 440-746, Korea

\*Corresponding author. E-mail: [npark@skku.edu](mailto:npark@skku.edu)

Contents

Figure S1-S7: pages S1-S6

Table S1: page S7

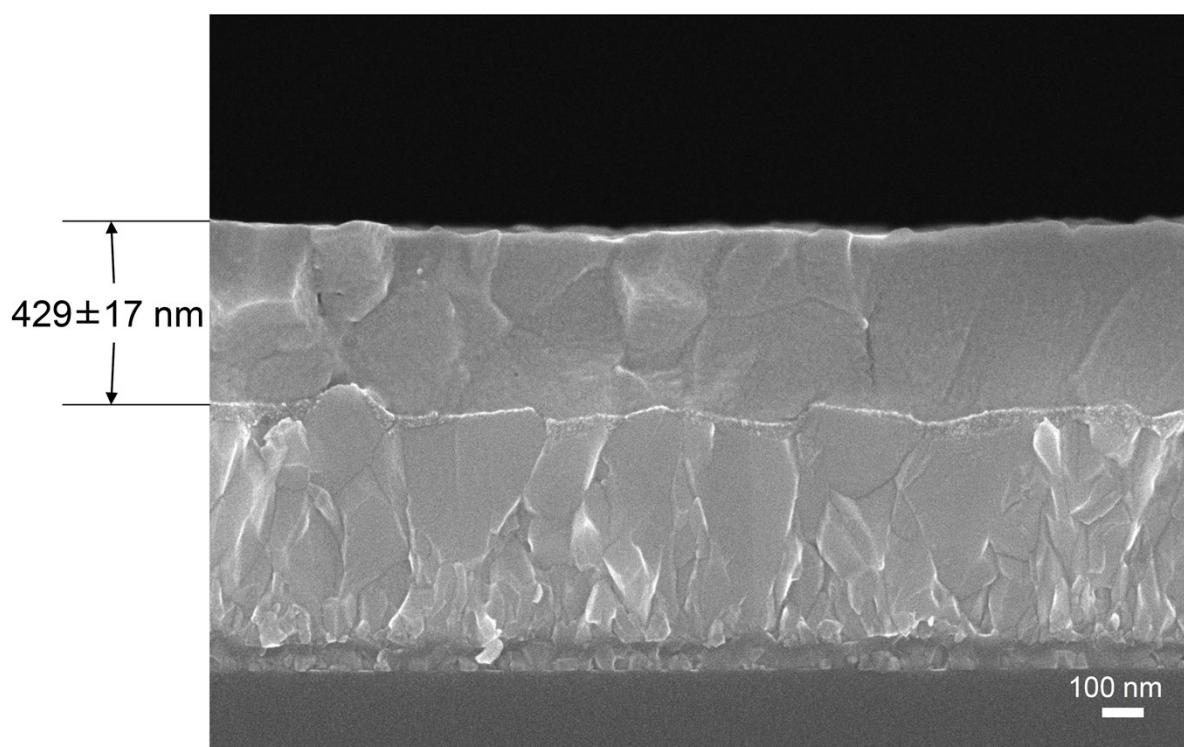

**Figure S1.** Cross-sectional SEM images of a pre-annealed MAPbI<sub>3</sub> film used for stamping.

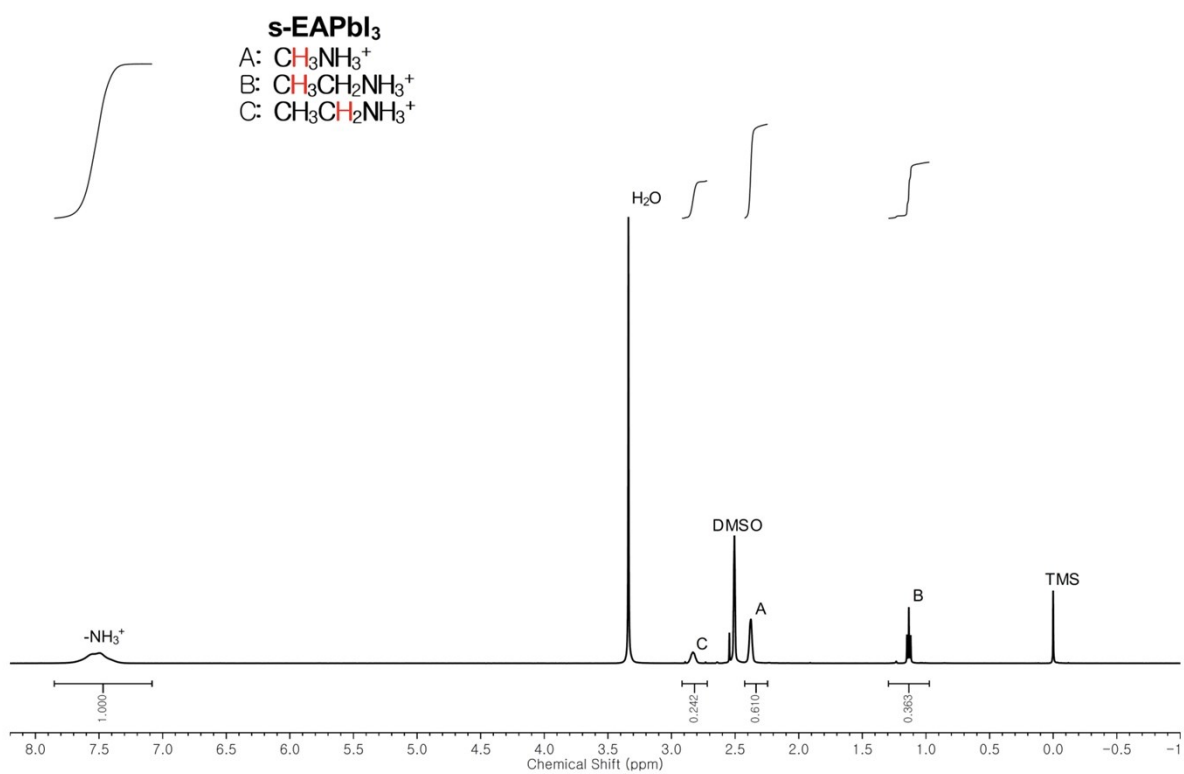

**Figure S2.** <sup>1</sup>H NMR for the stamped EAPbI<sub>3</sub> (s-EAPbI<sub>3</sub>) film.

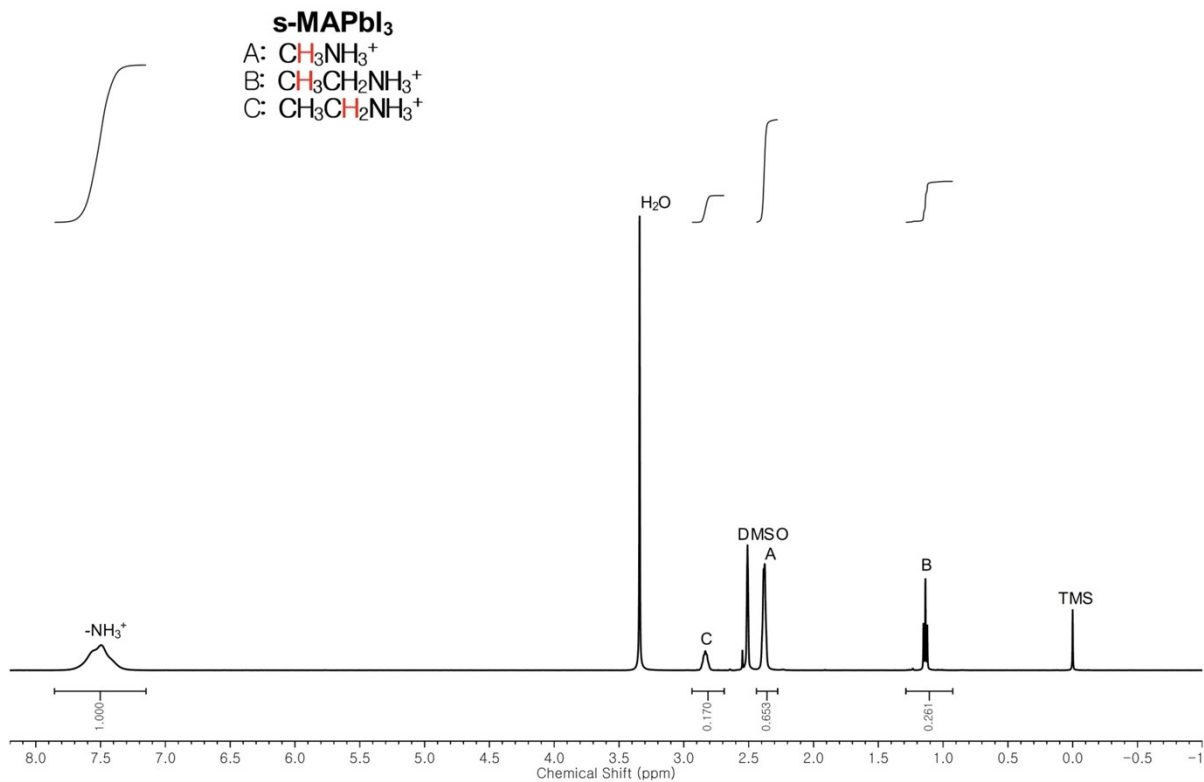

**Figure S3.** <sup>1</sup>H NMR for the stamped MAPbI<sub>3</sub> (s-MAPbI<sub>3</sub>) film.

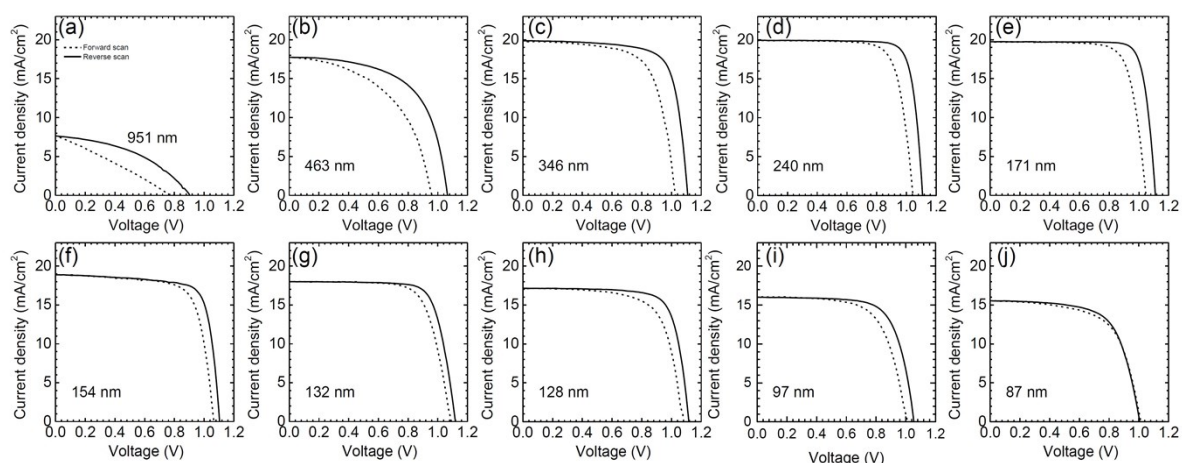

**Figure S4.** (a)-(j) J-V curves of PSCs employing the s-EAPbI<sub>3</sub> films with different thickness. The device structure was glass/FTO/SnO<sub>2</sub>/s-EAPbI<sub>3</sub>/spiro-MeOTAD/Au. The curves were measured under the simulated one sun illumination at scan rate of 130 mV/s. The solid line and dashed line represent J-V curves measured by reverse scan (RS) and forward scan (FS), respectively.

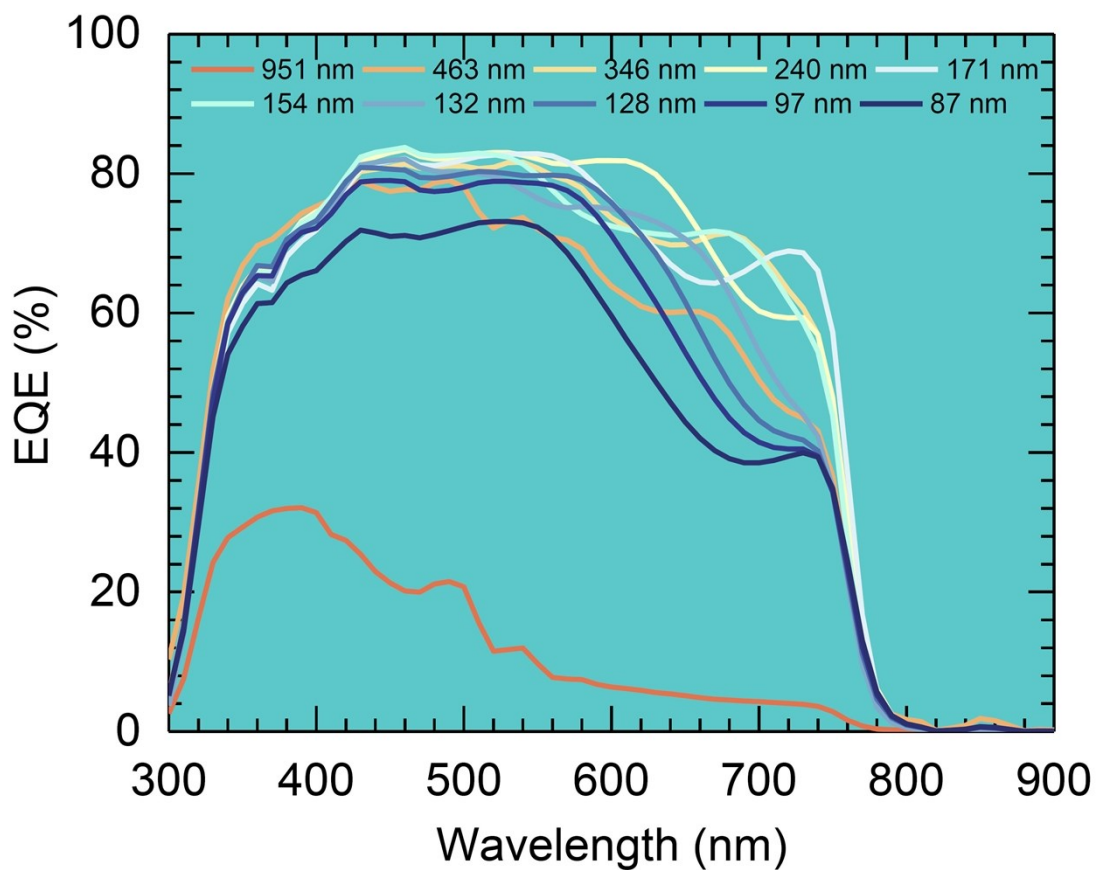

**Figure S5.** External quantum efficiency (EQE) as a function of wavelength for the PSCs employing s-EAPbI<sub>3</sub> with different thickness.

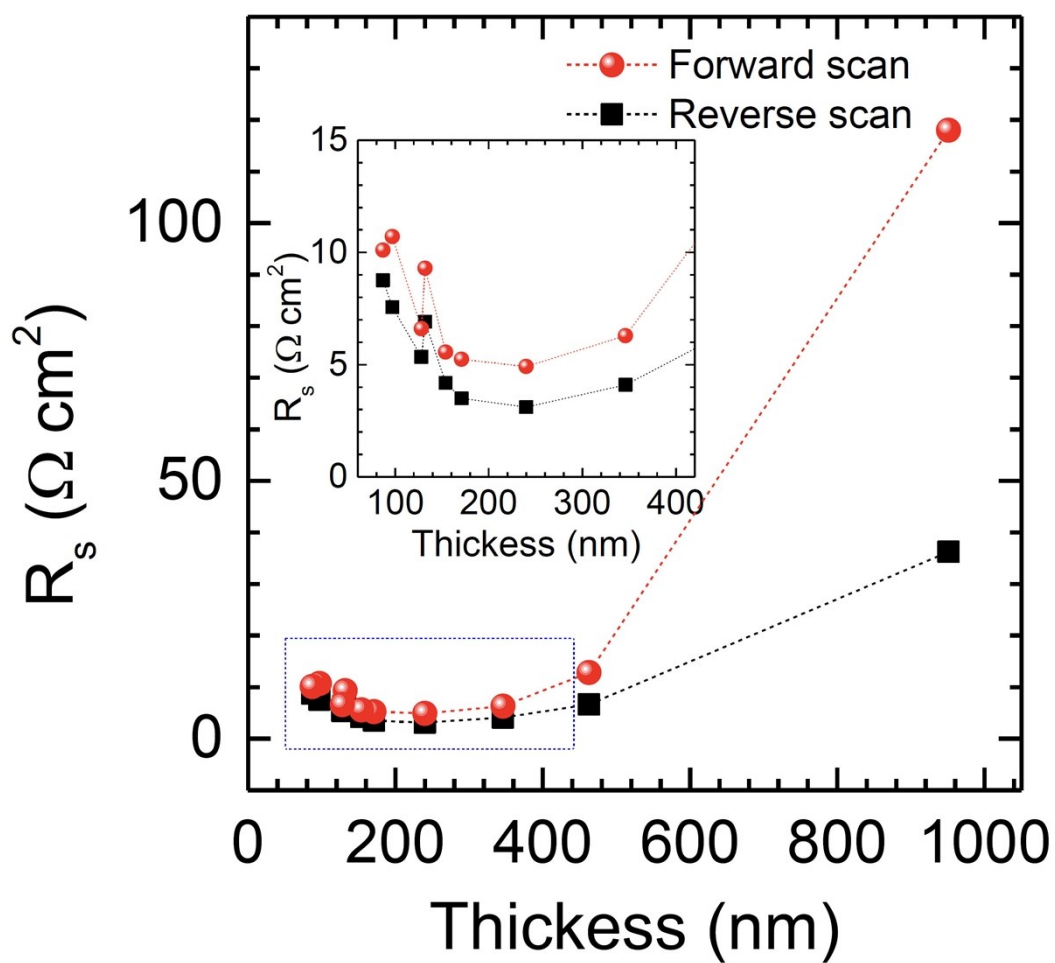

**Figure S6.** Series resistance ( $R_s$ ) of PSCs employing the  $s\text{-EAPbI}_3$  films with different thickness. Insert is the enlarged  $R_s$  for the 50 nm - 400 nm thickness.  $R_s$  was estimated from the champion J-V curves shown in Figure S4 by calculating the slope at  $V_{oc}$ .

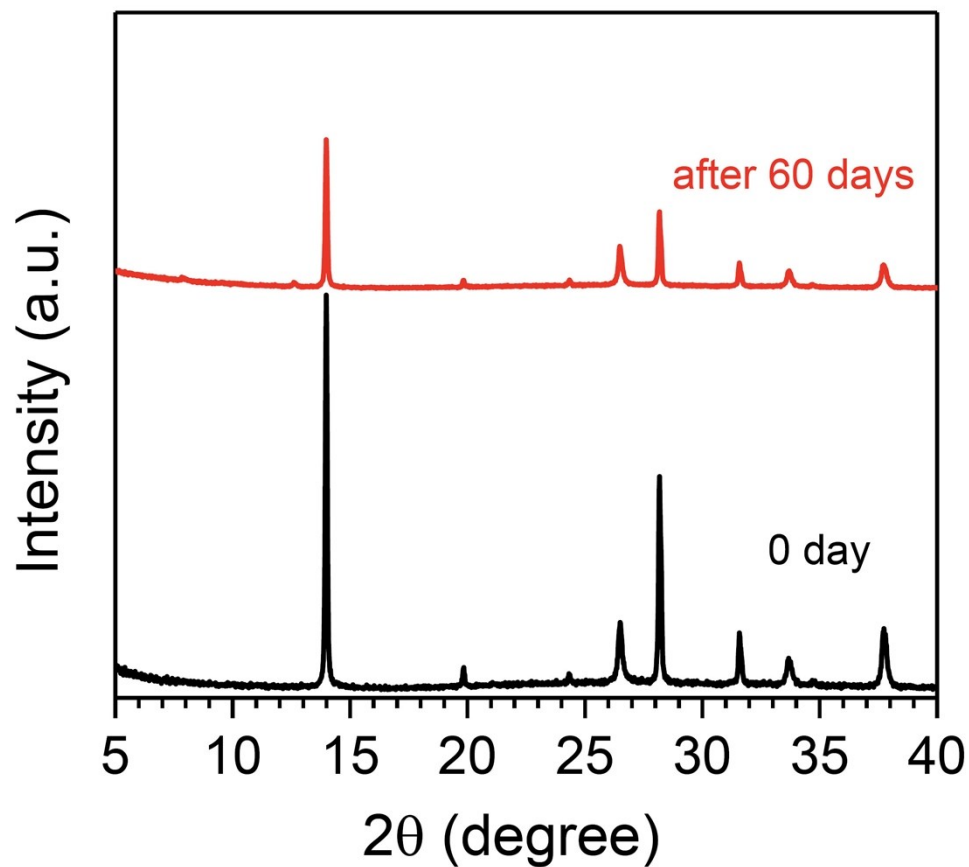

**Figure S7.** XRD of the 171 nm-thick s-EAPbI<sub>3</sub> film without (0 day) and with 60-day aging. The film was stored in the ambient temperature with the relative humidity of 20%-30%.

**Table S1.** Photovoltaic parameter of champion PSCs employing the s-EAPbI<sub>3</sub> films with different thickness. The device structure was glass/FTO/SnO<sub>2</sub>/s-EAPbI<sub>3</sub>/spiro-MeOTAD/Au. J-V curves were measure at reverse scan and forward scan at scan rate of 130 mV/s under simulated one sun illumination.

| Thickness | direction | J <sub>sc</sub> (mA/cm <sup>2</sup> ) | V <sub>oc</sub> (V) | FF    | PCE (%) | R <sub>s</sub> (Ω cm <sup>2</sup> ) |
|-----------|-----------|---------------------------------------|---------------------|-------|---------|-------------------------------------|
| 951 nm    | Reverse   | 7.639                                 | 0.903               | 0.426 | 2.94    | 36.25                               |
|           | Forward   | 7.675                                 | 0.801               | 0.268 | 1.65    | 118                                 |
| 463 nm    | Reverse   | 17.75                                 | 1.07                | 0.599 | 11.4    | 6.65                                |
|           | Forward   | 17.77                                 | 0.963               | 0.501 | 8.57    | 12.8                                |
| 346 nm    | Reverse   | 19.87                                 | 1.11                | 0.746 | 16.5    | 4.10                                |
|           | Forward   | 19.78                                 | 1.03                | 0.683 | 13.9    | 6.29                                |
| 240 nm    | Reverse   | 19.91                                 | 1.11                | 0.817 | 18.1    | 3.11                                |
|           | Forward   | 19.91                                 | 1.04                | 0.761 | 15.8    | 4.92                                |
| 171 nm    | Reverse   | 19.75                                 | 1.11                | 0.821 | 18.0    | 3.50                                |
|           | Forward   | 19.72                                 | 1.05                | 0.762 | 15.8    | 5.24                                |
| 154 nm    | Reverse   | 18.88                                 | 1.10                | 0.768 | 15.9    | 4.19                                |
|           | Forward   | 18.88                                 | 1.07                | 0.731 | 14.8    | 5.56                                |
| 132 nm    | Reverse   | 18.00                                 | 1.12                | 0.758 | 15.3    | 6.91                                |
|           | Forward   | 18.00                                 | 1.09                | 0.717 | 14.1    | 9.29                                |
| 128 nm    | Reverse   | 17.16                                 | 1.12                | 0.760 | 14.6    | 5.35                                |
|           | Forward   | 17.14                                 | 1.08                | 0.688 | 12.7    | 6.60                                |
| 97 nm     | Reverse   | 16.05                                 | 1.05                | 0.709 | 11.9    | 7.56                                |
|           | Forward   | 16.01                                 | 1.01                | 0.657 | 10.6    | 10.7                                |
| 87 nm     | Reverse   | 15.54                                 | 1.01                | 0.658 | 10.3    | 8.76                                |
|           | Forward   | 15.54                                 | 1.01                | 0.632 | 9.92    | 10.1                                |
